# Supplementary material
Source: MDPI journal article supplement (https://www.mdpi.com/2073-4441/14/11/1776)
Supplement: s1 [file s1]

*Supplementary material*

# Influence of dam breach parameter statistical definition on resulting rupture maximum discharge

Diego Bello<sup>1</sup>, Hernán Alcayaga<sup>1,\*</sup>, Diego Caamaño<sup>2</sup> and Alonso Pizarro<sup>1</sup>

<sup>1</sup> Escuela de Ingeniería en Obras Civiles, Universidad Diego Portales, Santiago 8370109, Chile; diego.bello@mail.udp.cl, hernan.alcayaga@udp.cl, alonso.pizarro@mail.udp.cl

<sup>2</sup> Departamento de Ingeniería Civil, Universidad Católica de la Santísima Concepción, Chile; dcaamano@ucsc.cl

\* Correspondence: hernan.alcayaga@udp.cl

**Table S1.** Combinations of statistical parameters.

| Statistical Parameter Set |       |        |       |
|---------------------------|-------|--------|-------|
| Max                       | tf-1  | Media  | Desv  |
| 3                         | 1.1   | 2.28   | 0.72  |
|                           | 1.2   | 1.91   | 0.60  |
| Min                       | 1.3   | 1.55   | 0.48  |
|                           | 1.4   | 1.19   | 0.36  |
| 0.1                       | 1.5   | 0.83   | 0.24  |
| Max                       | Inv-2 | Media  | Desv  |
| 1300                      | 2.1   | 1286.0 | 13.95 |
|                           | 2.2   | 1279.0 | 11.63 |
| Min                       | 2.3   | 1272.0 | 9.30  |
|                           | 2.4   | 1265.0 | 6.98  |
| 1244                      | 2.5   | 1258.0 | 4.65  |
| Max                       | B-3   | Media  | Desv  |
| 55                        | 3.1   | 43.25  | 11.70 |
|                           | 3.2   | 37.38  | 9.75  |
| Min                       | 3.3   | 31.50  | 7.80  |
|                           | 3.4   | 25.63  | 5.85  |
| 8                         | 3.5   | 19.75  | 3.90  |

**Table S2.** Combinations of statistical and deterministic parameters.

| Sub-Scenario | Probabilistic |     |     | Deterministic |      |      |         | Number of Iterations |
|--------------|---------------|-----|-----|---------------|------|------|---------|----------------------|
|              | tf            | Inv | B   | Lss           | Rss  | Cd   | Init    |                      |
| B1           | 1.1           | 2.1 | 3.1 | 1.07          | 0.66 | 2.83 | 1338.82 | 10000                |
| B2           | 1.1           | 2.1 | 3.2 | 1.07          | 0.66 | 2.83 | 1338.82 | 10000                |
| B3           | 1.1           | 2.1 | 3.3 | 1.07          | 0.66 | 2.83 | 1338.82 | 10000                |
| B4           | 1.1           | 2.1 | 3.4 | 1.07          | 0.66 | 2.83 | 1338.82 | 10000                |
| B5           | 1.1           | 2.1 | 3.5 | 1.07          | 0.66 | 2.83 | 1338.82 | 10000                |
| B6           | 1.1           | 2.2 | 3.1 | 1.07          | 0.66 | 2.83 | 1338.82 | 10000                |
| B7           | 1.1           | 2.2 | 3.2 | 1.07          | 0.66 | 2.83 | 1338.82 | 10000                |
| B8           | 1.1           | 2.2 | 3.3 | 1.07          | 0.66 | 2.83 | 1338.82 | 10000                |
| B9           | 1.1           | 2.2 | 3.4 | 1.07          | 0.66 | 2.83 | 1338.82 | 10000                |
| B10          | 1.1           | 2.2 | 3.5 | 1.07          | 0.66 | 2.83 | 1338.82 | 10000                |
| B11          | 1.1           | 2.3 | 3.1 | 1.07          | 0.66 | 2.83 | 1338.82 | 10000                |
| B12          | 1.1           | 2.3 | 3.2 | 1.07          | 0.66 | 2.83 | 1338.82 | 10000                |
| B13          | 1.1           | 2.3 | 3.3 | 1.07          | 0.66 | 2.83 | 1338.82 | 10000                |
| B14          | 1.1           | 2.3 | 3.4 | 1.07          | 0.66 | 2.83 | 1338.82 | 10000                |
| B15          | 1.1           | 2.3 | 3.5 | 1.07          | 0.66 | 2.83 | 1338.82 | 10000                |
| B16          | 1.1           | 2.4 | 3.1 | 1.07          | 0.66 | 2.83 | 1338.82 | 10000                |
| B17          | 1.1           | 2.4 | 3.2 | 1.07          | 0.66 | 2.83 | 1338.82 | 10000                |
| B18          | 1.1           | 2.4 | 3.3 | 1.07          | 0.66 | 2.83 | 1338.82 | 10000                |
| B19          | 1.1           | 2.4 | 3.4 | 1.07          | 0.66 | 2.83 | 1338.82 | 10000                |
| B20          | 1.1           | 2.4 | 3.5 | 1.07          | 0.66 | 2.83 | 1338.82 | 10000                |
| B21          | 1.1           | 2.5 | 3.1 | 1.07          | 0.66 | 2.83 | 1338.82 | 10000                |
| B22          | 1.1           | 2.5 | 3.2 | 1.07          | 0.66 | 2.83 | 1338.82 | 10000                |
| B23          | 1.1           | 2.5 | 3.3 | 1.07          | 0.66 | 2.83 | 1338.82 | 10000                |
| B24          | 1.1           | 2.5 | 3.4 | 1.07          | 0.66 | 2.83 | 1338.82 | 10000                |
| B25          | 1.1           | 2.5 | 3.5 | 1.07          | 0.66 | 2.83 | 1338.82 | 10000                |
| B26          | 1.2           | 2.1 | 3.1 | 1.07          | 0.66 | 2.83 | 1338.82 | 10000                |
| B27          | 1.2           | 2.1 | 3.2 | 1.07          | 0.66 | 2.83 | 1338.82 | 10000                |
| B28          | 1.2           | 2.1 | 3.3 | 1.07          | 0.66 | 2.83 | 1338.82 | 10000                |
| B29          | 1.2           | 2.1 | 3.4 | 1.07          | 0.66 | 2.83 | 1338.82 | 10000                |
| B30          | 1.2           | 2.1 | 3.5 | 1.07          | 0.66 | 2.83 | 1338.82 | 10000                |
| B31          | 1.2           | 2.2 | 3.1 | 1.07          | 0.66 | 2.83 | 1338.82 | 10000                |
| B32          | 1.2           | 2.2 | 3.2 | 1.07          | 0.66 | 2.83 | 1338.82 | 10000                |
| B33          | 1.2           | 2.2 | 3.3 | 1.07          | 0.66 | 2.83 | 1338.82 | 10000                |
| B34          | 1.2           | 2.2 | 3.4 | 1.07          | 0.66 | 2.83 | 1338.82 | 10000                |
| B35          | 1.2           | 2.2 | 3.5 | 1.07          | 0.66 | 2.83 | 1338.82 | 10000                |
| B36          | 1.2           | 2.3 | 3.1 | 1.07          | 0.66 | 2.83 | 1338.82 | 10000                |
| B37          | 1.2           | 2.3 | 3.2 | 1.07          | 0.66 | 2.83 | 1338.82 | 10000                |
| B38          | 1.2           | 2.3 | 3.3 | 1.07          | 0.66 | 2.83 | 1338.82 | 10000                |
| B39          | 1.2           | 2.3 | 3.4 | 1.07          | 0.66 | 2.83 | 1338.82 | 10000                |
| B40          | 1.2           | 2.3 | 3.5 | 1.07          | 0.66 | 2.83 | 1338.82 | 10000                |
| B41          | 1.2           | 2.4 | 3.1 | 1.07          | 0.66 | 2.83 | 1338.82 | 10000                |
| B42          | 1.2           | 2.4 | 3.2 | 1.07          | 0.66 | 2.83 | 1338.82 | 10000                |
| B43          | 1.2           | 2.4 | 3.3 | 1.07          | 0.66 | 2.83 | 1338.82 | 10000                |
| B44          | 1.2           | 2.4 | 3.4 | 1.07          | 0.66 | 2.83 | 1338.82 | 10000                |
| B45          | 1.2           | 2.4 | 3.5 | 1.07          | 0.66 | 2.83 | 1338.82 | 10000                |
| B46          | 1.2           | 2.5 | 3.1 | 1.07          | 0.66 | 2.83 | 1338.82 | 10000                |
| B47          | 1.2           | 2.5 | 3.2 | 1.07          | 0.66 | 2.83 | 1338.82 | 10000                |
| B48          | 1.2           | 2.5 | 3.3 | 1.07          | 0.66 | 2.83 | 1338.82 | 10000                |
| B49          | 1.2           | 2.5 | 3.4 | 1.07          | 0.66 | 2.83 | 1338.82 | 10000                |
| B50          | 1.2           | 2.5 | 3.5 | 1.07          | 0.66 | 2.83 | 1338.82 | 10000                |

| Sub-Scenario | Probabilistic |     |     | Deterministic |      |      |         | Number of Iterations |
|--------------|---------------|-----|-----|---------------|------|------|---------|----------------------|
|              | tf            | Inv | B   | Lss           | Rss  | Cd   | Init    |                      |
| B51          | 1.3           | 2.1 | 3.1 | 1.07          | 0.66 | 2.83 | 1338.82 | 10000                |
| B52          | 1.3           | 2.1 | 3.2 | 1.07          | 0.66 | 2.83 | 1338.82 | 10000                |
| B53          | 1.3           | 2.1 | 3.3 | 1.07          | 0.66 | 2.83 | 1338.82 | 10000                |
| B54          | 1.3           | 2.1 | 3.4 | 1.07          | 0.66 | 2.83 | 1338.82 | 10000                |
| B55          | 1.3           | 2.1 | 3.5 | 1.07          | 0.66 | 2.83 | 1338.82 | 10000                |
| B56          | 1.3           | 2.2 | 3.1 | 1.07          | 0.66 | 2.83 | 1338.82 | 10000                |
| B57          | 1.3           | 2.2 | 3.2 | 1.07          | 0.66 | 2.83 | 1338.82 | 10000                |
| B58          | 1.3           | 2.2 | 3.3 | 1.07          | 0.66 | 2.83 | 1338.82 | 10000                |
| B59          | 1.3           | 2.2 | 3.4 | 1.07          | 0.66 | 2.83 | 1338.82 | 10000                |
| B60          | 1.3           | 2.2 | 3.5 | 1.07          | 0.66 | 2.83 | 1338.82 | 10000                |
| B61          | 1.3           | 2.3 | 3.1 | 1.07          | 0.66 | 2.83 | 1338.82 | 10000                |
| B62          | 1.3           | 2.3 | 3.2 | 1.07          | 0.66 | 2.83 | 1338.82 | 10000                |
| B63          | 1.3           | 2.3 | 3.3 | 1.07          | 0.66 | 2.83 | 1338.82 | 10000                |
| B64          | 1.3           | 2.3 | 3.4 | 1.07          | 0.66 | 2.83 | 1338.82 | 10000                |
| B65          | 1.3           | 2.3 | 3.5 | 1.07          | 0.66 | 2.83 | 1338.82 | 10000                |
| B66          | 1.3           | 2.4 | 3.1 | 1.07          | 0.66 | 2.83 | 1338.82 | 10000                |
| B67          | 1.3           | 2.4 | 3.2 | 1.07          | 0.66 | 2.83 | 1338.82 | 10000                |
| B68          | 1.3           | 2.4 | 3.3 | 1.07          | 0.66 | 2.83 | 1338.82 | 10000                |
| B69          | 1.3           | 2.4 | 3.4 | 1.07          | 0.66 | 2.83 | 1338.82 | 10000                |
| B70          | 1.3           | 2.4 | 3.5 | 1.07          | 0.66 | 2.83 | 1338.82 | 10000                |
| B71          | 1.3           | 2.5 | 3.1 | 1.07          | 0.66 | 2.83 | 1338.82 | 10000                |
| B72          | 1.3           | 2.5 | 3.2 | 1.07          | 0.66 | 2.83 | 1338.82 | 10000                |
| B73          | 1.3           | 2.5 | 3.3 | 1.07          | 0.66 | 2.83 | 1338.82 | 10000                |
| B74          | 1.3           | 2.5 | 3.4 | 1.07          | 0.66 | 2.83 | 1338.82 | 10000                |
| B75          | 1.3           | 2.5 | 3.5 | 1.07          | 0.66 | 2.83 | 1338.82 | 10000                |
| B76          | 1.4           | 2.1 | 3.1 | 1.07          | 0.66 | 2.83 | 1338.82 | 10000                |
| B77          | 1.4           | 2.1 | 3.2 | 1.07          | 0.66 | 2.83 | 1338.82 | 10000                |
| B78          | 1.4           | 2.1 | 3.3 | 1.07          | 0.66 | 2.83 | 1338.82 | 10000                |
| B79          | 1.4           | 2.1 | 3.4 | 1.07          | 0.66 | 2.83 | 1338.82 | 10000                |
| B80          | 1.4           | 2.1 | 3.5 | 1.07          | 0.66 | 2.83 | 1338.82 | 10000                |
| B81          | 1.4           | 2.2 | 3.1 | 1.07          | 0.66 | 2.83 | 1338.82 | 10000                |
| B82          | 1.4           | 2.2 | 3.2 | 1.07          | 0.66 | 2.83 | 1338.82 | 10000                |
| B83          | 1.4           | 2.2 | 3.3 | 1.07          | 0.66 | 2.83 | 1338.82 | 10000                |
| B84          | 1.4           | 2.2 | 3.4 | 1.07          | 0.66 | 2.83 | 1338.82 | 10000                |
| B85          | 1.4           | 2.2 | 3.5 | 1.07          | 0.66 | 2.83 | 1338.82 | 10000                |
| B86          | 1.4           | 2.3 | 3.1 | 1.07          | 0.66 | 2.83 | 1338.82 | 10000                |
| B87          | 1.4           | 2.3 | 3.2 | 1.07          | 0.66 | 2.83 | 1338.82 | 10000                |
| B88          | 1.4           | 2.3 | 3.3 | 1.07          | 0.66 | 2.83 | 1338.82 | 10000                |
| B89          | 1.4           | 2.3 | 3.4 | 1.07          | 0.66 | 2.83 | 1338.82 | 10000                |
| B90          | 1.4           | 2.3 | 3.5 | 1.07          | 0.66 | 2.83 | 1338.82 | 10000                |
| B91          | 1.4           | 2.4 | 3.1 | 1.07          | 0.66 | 2.83 | 1338.82 | 10000                |
| B92          | 1.4           | 2.4 | 3.2 | 1.07          | 0.66 | 2.83 | 1338.82 | 10000                |
| B93          | 1.4           | 2.4 | 3.3 | 1.07          | 0.66 | 2.83 | 1338.82 | 10000                |
| B94          | 1.4           | 2.4 | 3.4 | 1.07          | 0.66 | 2.83 | 1338.82 | 10000                |
| B95          | 1.4           | 2.4 | 3.5 | 1.07          | 0.66 | 2.83 | 1338.82 | 10000                |
| B96          | 1.4           | 2.5 | 3.1 | 1.07          | 0.66 | 2.83 | 1338.82 | 10000                |
| B97          | 1.4           | 2.5 | 3.2 | 1.07          | 0.66 | 2.83 | 1338.82 | 10000                |
| B98          | 1.4           | 2.5 | 3.3 | 1.07          | 0.66 | 2.83 | 1338.82 | 10000                |
| B99          | 1.4           | 2.5 | 3.4 | 1.07          | 0.66 | 2.83 | 1338.82 | 10000                |
| B100         | 1.4           | 2.5 | 3.5 | 1.07          | 0.66 | 2.83 | 1338.82 | 10000                |
| B101         | 1.5           | 2.1 | 3.1 | 1.07          | 0.66 | 2.83 | 1338.82 | 10000                |
| B102         | 1.5           | 2.1 | 3.2 | 1.07          | 0.66 | 2.83 | 1338.82 | 10000                |

| Sub-Scenario | Probabilistic |     |     | Deterministic |      |      |         | Number of Iterations |
|--------------|---------------|-----|-----|---------------|------|------|---------|----------------------|
|              | tf            | Inv | B   | Lss           | Rss  | Cd   | Init    |                      |
| B103         | 1.5           | 2.1 | 3.3 | 1.07          | 0.66 | 2.83 | 1338.82 | 10000                |
| B104         | 1.5           | 2.1 | 3.4 | 1.07          | 0.66 | 2.83 | 1338.82 | 10000                |
| B105         | 1.5           | 2.1 | 3.5 | 1.07          | 0.66 | 2.83 | 1338.82 | 10000                |
| B106         | 1.5           | 2.2 | 3.1 | 1.07          | 0.66 | 2.83 | 1338.82 | 10000                |
| B107         | 1.5           | 2.2 | 3.2 | 1.07          | 0.66 | 2.83 | 1338.82 | 10000                |
| B108         | 1.5           | 2.2 | 3.3 | 1.07          | 0.66 | 2.83 | 1338.82 | 10000                |
| B109         | 1.5           | 2.2 | 3.4 | 1.07          | 0.66 | 2.83 | 1338.82 | 10000                |
| B110         | 1.5           | 2.2 | 3.5 | 1.07          | 0.66 | 2.83 | 1338.82 | 10000                |
| B111         | 1.5           | 2.3 | 3.1 | 1.07          | 0.66 | 2.83 | 1338.82 | 10000                |
| B112         | 1.5           | 2.3 | 3.2 | 1.07          | 0.66 | 2.83 | 1338.82 | 10000                |
| B113         | 1.5           | 2.3 | 3.3 | 1.07          | 0.66 | 2.83 | 1338.82 | 10000                |
| B114         | 1.5           | 2.3 | 3.4 | 1.07          | 0.66 | 2.83 | 1338.82 | 10000                |
| B115         | 1.5           | 2.3 | 3.5 | 1.07          | 0.66 | 2.83 | 1338.82 | 10000                |
| B116         | 1.5           | 2.4 | 3.1 | 1.07          | 0.66 | 2.83 | 1338.82 | 10000                |
| B117         | 1.5           | 2.4 | 3.2 | 1.07          | 0.66 | 2.83 | 1338.82 | 10000                |
| B118         | 1.5           | 2.4 | 3.3 | 1.07          | 0.66 | 2.83 | 1338.82 | 10000                |
| B119         | 1.5           | 2.4 | 3.4 | 1.07          | 0.66 | 2.83 | 1338.82 | 10000                |
| B120         | 1.5           | 2.4 | 3.5 | 1.07          | 0.66 | 2.83 | 1338.82 | 10000                |
| B121         | 1.5           | 2.5 | 3.1 | 1.07          | 0.66 | 2.83 | 1338.82 | 10000                |
| B122         | 1.5           | 2.5 | 3.2 | 1.07          | 0.66 | 2.83 | 1338.82 | 10000                |
| B123         | 1.5           | 2.5 | 3.3 | 1.07          | 0.66 | 2.83 | 1338.82 | 10000                |
| B124         | 1.5           | 2.5 | 3.4 | 1.07          | 0.66 | 2.83 | 1338.82 | 10000                |
| B125         | 1.5           | 2.5 | 3.5 | 1.07          | 0.66 | 2.83 | 1338.82 | 10000                |

**Table S3.** Combinations of breach parameters.

| Sub-Scenario | Probabilistic |                    |         |                    |       |                    | Deterministic |      |      |         | Number of Iterations |
|--------------|---------------|--------------------|---------|--------------------|-------|--------------------|---------------|------|------|---------|----------------------|
|              | tf            |                    | Inv     |                    | B     |                    | Lss           | Rss  | Cd   | Init    |                      |
|              | Mean          | Standard Deviation | Mean    | Standard Deviation | Mean  | Standard Deviation |               |      |      |         |                      |
| B1           | 2.28          | 0.72               | 1286.00 | 13.95              | 43.25 | 11.70              | 1.07          | 0.66 | 2.83 | 1338.82 | 10000                |
| B2           | 2.28          | 0.72               | 1286.00 | 13.95              | 37.38 | 9.75               | 1.07          | 0.66 | 2.83 | 1338.82 | 10000                |
| B3           | 2.28          | 0.72               | 1286.00 | 13.95              | 31.50 | 7.80               | 1.07          | 0.66 | 2.83 | 1338.82 | 10000                |
| B4           | 2.28          | 0.72               | 1286.00 | 13.95              | 25.63 | 5.85               | 1.07          | 0.66 | 2.83 | 1338.82 | 10000                |
| B5           | 2.28          | 0.72               | 1286.00 | 13.95              | 19.75 | 3.90               | 1.07          | 0.66 | 2.83 | 1338.82 | 10000                |
| B6           | 2.28          | 0.72               | 1279.00 | 11.63              | 43.25 | 11.70              | 1.07          | 0.66 | 2.83 | 1338.82 | 10000                |
| B7           | 2.28          | 0.72               | 1279.00 | 11.63              | 37.38 | 9.75               | 1.07          | 0.66 | 2.83 | 1338.82 | 10000                |
| B8           | 2.28          | 0.72               | 1279.00 | 11.63              | 31.50 | 7.80               | 1.07          | 0.66 | 2.83 | 1338.82 | 10000                |
| B9           | 2.28          | 0.72               | 1279.00 | 11.63              | 25.63 | 5.85               | 1.07          | 0.66 | 2.83 | 1338.82 | 10000                |
| B10          | 2.28          | 0.72               | 1279.00 | 11.63              | 19.75 | 3.90               | 1.07          | 0.66 | 2.83 | 1338.82 | 10000                |
| B11          | 2.28          | 0.72               | 1272.00 | 9.30               | 43.25 | 11.70              | 1.07          | 0.66 | 2.83 | 1338.82 | 10000                |
| B12          | 2.28          | 0.72               | 1272.00 | 9.30               | 37.38 | 9.75               | 1.07          | 0.66 | 2.83 | 1338.82 | 10000                |
| B13          | 2.28          | 0.72               | 1272.00 | 9.30               | 31.50 | 7.80               | 1.07          | 0.66 | 2.83 | 1338.82 | 10000                |
| B14          | 2.28          | 0.72               | 1272.00 | 9.30               | 25.63 | 5.85               | 1.07          | 0.66 | 2.83 | 1338.82 | 10000                |
| B15          | 2.28          | 0.72               | 1272.00 | 9.30               | 19.75 | 3.90               | 1.07          | 0.66 | 2.83 | 1338.82 | 10000                |
| B16          | 2.28          | 0.72               | 1265.00 | 6.98               | 43.25 | 11.70              | 1.07          | 0.66 | 2.83 | 1338.82 | 10000                |
| B17          | 2.28          | 0.72               | 1265.00 | 6.98               | 37.38 | 9.75               | 1.07          | 0.66 | 2.83 | 1338.82 | 10000                |
| B18          | 2.28          | 0.72               | 1265.00 | 6.98               | 31.50 | 7.80               | 1.07          | 0.66 | 2.83 | 1338.82 | 10000                |
| B19          | 2.28          | 0.72               | 1265.00 | 6.98               | 25.63 | 5.85               | 1.07          | 0.66 | 2.83 | 1338.82 | 10000                |
| B20          | 2.28          | 0.72               | 1265.00 | 6.98               | 19.75 | 3.90               | 1.07          | 0.66 | 2.83 | 1338.82 | 10000                |
| B21          | 2.28          | 0.72               | 1258.00 | 4.65               | 43.25 | 11.70              | 1.07          | 0.66 | 2.83 | 1338.82 | 10000                |
| B22          | 2.28          | 0.72               | 1258.00 | 4.65               | 37.38 | 9.75               | 1.07          | 0.66 | 2.83 | 1338.82 | 10000                |
| B23          | 2.28          | 0.72               | 1258.00 | 4.65               | 31.50 | 7.80               | 1.07          | 0.66 | 2.83 | 1338.82 | 10000                |
| B24          | 2.28          | 0.72               | 1258.00 | 4.65               | 25.63 | 5.85               | 1.07          | 0.66 | 2.83 | 1338.82 | 10000                |
| B25          | 2.28          | 0.72               | 1258.00 | 4.65               | 19.75 | 3.90               | 1.07          | 0.66 | 2.83 | 1338.82 | 10000                |
| B26          | 1.91          | 0.60               | 1286.00 | 13.95              | 43.25 | 11.70              | 1.07          | 0.66 | 2.83 | 1338.82 | 10000                |
| B27          | 1.91          | 0.60               | 1286.00 | 13.95              | 37.38 | 9.75               | 1.07          | 0.66 | 2.83 | 1338.82 | 10000                |
| B28          | 1.91          | 0.60               | 1286.00 | 13.95              | 31.50 | 7.80               | 1.07          | 0.66 | 2.83 | 1338.82 | 10000                |
| B29          | 1.91          | 0.60               | 1286.00 | 13.95              | 25.63 | 5.85               | 1.07          | 0.66 | 2.83 | 1338.82 | 10000                |
| B30          | 1.91          | 0.60               | 1286.00 | 13.95              | 19.75 | 3.90               | 1.07          | 0.66 | 2.83 | 1338.82 | 10000                |
| B31          | 1.91          | 0.60               | 1279.00 | 11.63              | 43.25 | 11.70              | 1.07          | 0.66 | 2.83 | 1338.82 | 10000                |
| B32          | 1.91          | 0.60               | 1279.00 | 11.63              | 37.38 | 9.75               | 1.07          | 0.66 | 2.83 | 1338.82 | 10000                |
| B33          | 1.91          | 0.60               | 1279.00 | 11.63              | 31.50 | 7.80               | 1.07          | 0.66 | 2.83 | 1338.82 | 10000                |
| B34          | 1.91          | 0.60               | 1279.00 | 11.63              | 25.63 | 5.85               | 1.07          | 0.66 | 2.83 | 1338.82 | 10000                |
| B35          | 1.91          | 0.60               | 1279.00 | 11.63              | 19.75 | 3.90               | 1.07          | 0.66 | 2.83 | 1338.82 | 10000                |
| B36          | 1.91          | 0.60               | 1272.00 | 9.30               | 43.25 | 11.70              | 1.07          | 0.66 | 2.83 | 1338.82 | 10000                |
| B37          | 1.91          | 0.60               | 1272.00 | 9.30               | 37.38 | 9.75               | 1.07          | 0.66 | 2.83 | 1338.82 | 10000                |
| B38          | 1.91          | 0.60               | 1272.00 | 9.30               | 31.50 | 7.80               | 1.07          | 0.66 | 2.83 | 1338.82 | 10000                |
| B39          | 1.91          | 0.60               | 1272.00 | 9.30               | 25.63 | 5.85               | 1.07          | 0.66 | 2.83 | 1338.82 | 10000                |
| B40          | 1.91          | 0.60               | 1272.00 | 9.30               | 19.75 | 3.90               | 1.07          | 0.66 | 2.83 | 1338.82 | 10000                |
| B41          | 1.91          | 0.60               | 1265.00 | 6.98               | 43.25 | 11.70              | 1.07          | 0.66 | 2.83 | 1338.82 | 10000                |
| B42          | 1.91          | 0.60               | 1265.00 | 6.98               | 37.38 | 9.75               | 1.07          | 0.66 | 2.83 | 1338.82 | 10000                |
| B43          | 1.91          | 0.60               | 1265.00 | 6.98               | 31.50 | 7.80               | 1.07          | 0.66 | 2.83 | 1338.82 | 10000                |
| B44          | 1.91          | 0.60               | 1265.00 | 6.98               | 25.63 | 5.85               | 1.07          | 0.66 | 2.83 | 1338.82 | 10000                |
| B45          | 1.91          | 0.60               | 1265.00 | 6.98               | 19.75 | 3.90               | 1.07          | 0.66 | 2.83 | 1338.82 | 10000                |
| B46          | 1.91          | 0.60               | 1258.00 | 4.65               | 43.25 | 11.70              | 1.07          | 0.66 | 2.83 | 1338.82 | 10000                |
| B47          | 1.91          | 0.60               | 1258.00 | 4.65               | 37.38 | 9.75               | 1.07          | 0.66 | 2.83 | 1338.82 | 10000                |
| B48          | 1.91          | 0.60               | 1258.00 | 4.65               | 31.50 | 7.80               | 1.07          | 0.66 | 2.83 | 1338.82 | 10000                |
| B49          | 1.91          | 0.60               | 1258.00 | 4.65               | 25.63 | 5.85               | 1.07          | 0.66 | 2.83 | 1338.82 | 10000                |
| B50          | 1.91          | 0.60               | 1258.00 | 4.65               | 19.75 | 3.90               | 1.07          | 0.66 | 2.83 | 1338.82 | 10000                |
| B51          | 1.55          | 0.48               | 1286.00 | 13.95              | 43.25 | 11.70              | 1.07          | 0.66 | 2.83 | 1338.82 | 10000                |
| B52          | 1.55          | 0.48               | 1286.00 | 13.95              | 37.38 | 9.75               | 1.07          | 0.66 | 2.83 | 1338.82 | 10000                |
| B53          | 1.55          | 0.48               | 1286.00 | 13.95              | 31.50 | 7.80               | 1.07          | 0.66 | 2.83 | 1338.82 | 10000                |
| B54          | 1.55          | 0.48               | 1286.00 | 13.95              | 25.63 | 5.85               | 1.07          | 0.66 | 2.83 | 1338.82 | 10000                |

| Sub-Scenario | Probabilistic |                    |         |                    |       |                    | Deterministic |      |      |         | Number of Iterations |
|--------------|---------------|--------------------|---------|--------------------|-------|--------------------|---------------|------|------|---------|----------------------|
|              | tf            |                    | Inv     |                    | B     |                    | Lss           | Rss  | Cd   | Init    |                      |
|              | Mean          | Standard Deviation | Mean    | Standard Deviation | Mean  | Standard Deviation |               |      |      |         |                      |
| B55          | 1.55          | 0.48               | 1286.00 | 13.95              | 19.75 | 3.90               | 1.07          | 0.66 | 2.83 | 1338.82 | 10000                |
| B56          | 1.55          | 0.48               | 1279.00 | 11.63              | 43.25 | 11.70              | 1.07          | 0.66 | 2.83 | 1338.82 | 10000                |
| B57          | 1.55          | 0.48               | 1279.00 | 11.63              | 37.38 | 9.75               | 1.07          | 0.66 | 2.83 | 1338.82 | 10000                |
| B58          | 1.55          | 0.48               | 1279.00 | 11.63              | 31.50 | 7.80               | 1.07          | 0.66 | 2.83 | 1338.82 | 10000                |
| B59          | 1.55          | 0.48               | 1279.00 | 11.63              | 25.63 | 5.85               | 1.07          | 0.66 | 2.83 | 1338.82 | 10000                |
| B60          | 1.55          | 0.48               | 1279.00 | 11.63              | 19.75 | 3.90               | 1.07          | 0.66 | 2.83 | 1338.82 | 10000                |
| B61          | 1.55          | 0.48               | 1272.00 | 9.30               | 43.25 | 11.70              | 1.07          | 0.66 | 2.83 | 1338.82 | 10000                |
| B62          | 1.55          | 0.48               | 1272.00 | 9.30               | 37.38 | 9.75               | 1.07          | 0.66 | 2.83 | 1338.82 | 10000                |
| B63          | 1.55          | 0.48               | 1272.00 | 9.30               | 31.50 | 7.80               | 1.07          | 0.66 | 2.83 | 1338.82 | 10000                |
| B64          | 1.55          | 0.48               | 1272.00 | 9.30               | 25.63 | 5.85               | 1.07          | 0.66 | 2.83 | 1338.82 | 10000                |
| B65          | 1.55          | 0.48               | 1272.00 | 9.30               | 19.75 | 3.90               | 1.07          | 0.66 | 2.83 | 1338.82 | 10000                |
| B66          | 1.55          | 0.48               | 1265.00 | 6.98               | 43.25 | 11.70              | 1.07          | 0.66 | 2.83 | 1338.82 | 10000                |
| B67          | 1.55          | 0.48               | 1265.00 | 6.98               | 37.38 | 9.75               | 1.07          | 0.66 | 2.83 | 1338.82 | 10000                |
| B68          | 1.55          | 0.48               | 1265.00 | 6.98               | 31.50 | 7.80               | 1.07          | 0.66 | 2.83 | 1338.82 | 10000                |
| B69          | 1.55          | 0.48               | 1265.00 | 6.98               | 25.63 | 5.85               | 1.07          | 0.66 | 2.83 | 1338.82 | 10000                |
| B70          | 1.55          | 0.48               | 1265.00 | 6.98               | 19.75 | 3.90               | 1.07          | 0.66 | 2.83 | 1338.82 | 10000                |
| B71          | 1.55          | 0.48               | 1258.00 | 4.65               | 43.25 | 11.70              | 1.07          | 0.66 | 2.83 | 1338.82 | 10000                |
| B72          | 1.55          | 0.48               | 1258.00 | 4.65               | 37.38 | 9.75               | 1.07          | 0.66 | 2.83 | 1338.82 | 10000                |
| B73          | 1.55          | 0.48               | 1258.00 | 4.65               | 31.50 | 7.80               | 1.07          | 0.66 | 2.83 | 1338.82 | 10000                |
| B74          | 1.55          | 0.48               | 1258.00 | 4.65               | 25.63 | 5.85               | 1.07          | 0.66 | 2.83 | 1338.82 | 10000                |
| B75          | 1.55          | 0.48               | 1258.00 | 4.65               | 19.75 | 3.90               | 1.07          | 0.66 | 2.83 | 1338.82 | 10000                |
| B76          | 1.19          | 0.36               | 1286.00 | 13.95              | 43.25 | 11.70              | 1.07          | 0.66 | 2.83 | 1338.82 | 10000                |
| B77          | 1.19          | 0.36               | 1286.00 | 13.95              | 37.38 | 9.75               | 1.07          | 0.66 | 2.83 | 1338.82 | 10000                |
| B78          | 1.19          | 0.36               | 1286.00 | 13.95              | 31.50 | 7.80               | 1.07          | 0.66 | 2.83 | 1338.82 | 10000                |
| B79          | 1.19          | 0.36               | 1286.00 | 13.95              | 25.63 | 5.85               | 1.07          | 0.66 | 2.83 | 1338.82 | 10000                |
| B80          | 1.19          | 0.36               | 1286.00 | 13.95              | 19.75 | 3.90               | 1.07          | 0.66 | 2.83 | 1338.82 | 10000                |
| B81          | 1.19          | 0.36               | 1279.00 | 11.63              | 43.25 | 11.70              | 1.07          | 0.66 | 2.83 | 1338.82 | 10000                |
| B82          | 1.19          | 0.36               | 1279.00 | 11.63              | 37.38 | 9.75               | 1.07          | 0.66 | 2.83 | 1338.82 | 10000                |
| B83          | 1.19          | 0.36               | 1279.00 | 11.63              | 31.50 | 7.80               | 1.07          | 0.66 | 2.83 | 1338.82 | 10000                |
| B84          | 1.19          | 0.36               | 1279.00 | 11.63              | 25.63 | 5.85               | 1.07          | 0.66 | 2.83 | 1338.82 | 10000                |
| B85          | 1.19          | 0.36               | 1279.00 | 11.63              | 19.75 | 3.90               | 1.07          | 0.66 | 2.83 | 1338.82 | 10000                |
| B86          | 1.19          | 0.36               | 1272.00 | 9.30               | 43.25 | 11.70              | 1.07          | 0.66 | 2.83 | 1338.82 | 10000                |
| B87          | 1.19          | 0.36               | 1272.00 | 9.30               | 37.38 | 9.75               | 1.07          | 0.66 | 2.83 | 1338.82 | 10000                |
| B88          | 1.19          | 0.36               | 1272.00 | 9.30               | 31.50 | 7.80               | 1.07          | 0.66 | 2.83 | 1338.82 | 10000                |
| B89          | 1.19          | 0.36               | 1272.00 | 9.30               | 25.63 | 5.85               | 1.07          | 0.66 | 2.83 | 1338.82 | 10000                |
| B90          | 1.19          | 0.36               | 1272.00 | 9.30               | 19.75 | 3.90               | 1.07          | 0.66 | 2.83 | 1338.82 | 10000                |
| B91          | 1.19          | 0.36               | 1265.00 | 6.98               | 43.25 | 11.70              | 1.07          | 0.66 | 2.83 | 1338.82 | 10000                |
| B92          | 1.19          | 0.36               | 1265.00 | 6.98               | 37.38 | 9.75               | 1.07          | 0.66 | 2.83 | 1338.82 | 10000                |
| B93          | 1.19          | 0.36               | 1265.00 | 6.98               | 31.50 | 7.80               | 1.07          | 0.66 | 2.83 | 1338.82 | 10000                |
| B94          | 1.19          | 0.36               | 1265.00 | 6.98               | 25.63 | 5.85               | 1.07          | 0.66 | 2.83 | 1338.82 | 10000                |
| B95          | 1.19          | 0.36               | 1265.00 | 6.98               | 19.75 | 3.90               | 1.07          | 0.66 | 2.83 | 1338.82 | 10000                |
| B96          | 1.19          | 0.36               | 1258.00 | 4.65               | 43.25 | 11.70              | 1.07          | 0.66 | 2.83 | 1338.82 | 10000                |
| B97          | 1.19          | 0.36               | 1258.00 | 4.65               | 37.38 | 9.75               | 1.07          | 0.66 | 2.83 | 1338.82 | 10000                |
| B98          | 1.19          | 0.36               | 1258.00 | 4.65               | 31.50 | 7.80               | 1.07          | 0.66 | 2.83 | 1338.82 | 10000                |
| B99          | 1.19          | 0.36               | 1258.00 | 4.65               | 25.63 | 5.85               | 1.07          | 0.66 | 2.83 | 1338.82 | 10000                |
| B100         | 1.19          | 0.36               | 1258.00 | 4.65               | 19.75 | 3.90               | 1.07          | 0.66 | 2.83 | 1338.82 | 10000                |
| B101         | 0.83          | 0.24               | 1286.00 | 13.95              | 43.25 | 11.70              | 1.07          | 0.66 | 2.83 | 1338.82 | 10000                |
| B102         | 0.83          | 0.24               | 1286.00 | 13.95              | 37.38 | 9.75               | 1.07          | 0.66 | 2.83 | 1338.82 | 10000                |
| B103         | 0.83          | 0.24               | 1286.00 | 13.95              | 31.50 | 7.80               | 1.07          | 0.66 | 2.83 | 1338.82 | 10000                |
| B104         | 0.83          | 0.24               | 1286.00 | 13.95              | 25.63 | 5.85               | 1.07          | 0.66 | 2.83 | 1338.82 | 10000                |
| B105         | 0.83          | 0.24               | 1286.00 | 13.95              | 19.75 | 3.90               | 1.07          | 0.66 | 2.83 | 1338.82 | 10000                |
| B106         | 0.83          | 0.24               | 1279.00 | 11.63              | 43.25 | 11.70              | 1.07          | 0.66 | 2.83 | 1338.82 | 10000                |
| B107         | 0.83          | 0.24               | 1279.00 | 11.63              | 37.38 | 9.75               | 1.07          | 0.66 | 2.83 | 1338.82 | 10000                |
| B108         | 0.83          | 0.24               | 1279.00 | 11.63              | 31.50 | 7.80               | 1.07          | 0.66 | 2.83 | 1338.82 | 10000                |
| B109         | 0.83          | 0.24               | 1279.00 | 11.63              | 25.63 | 5.85               | 1.07          | 0.66 | 2.83 | 1338.82 | 10000                |

| Sub-Scenario | Probabilistic |                    |         |                    |       |                    | Deterministic |      |      |         | Number of Iterations |
|--------------|---------------|--------------------|---------|--------------------|-------|--------------------|---------------|------|------|---------|----------------------|
|              | tf            |                    | Inv     |                    | B     |                    | Lss           | Rss  | Cd   | Init    |                      |
|              | Mean          | Standard Deviation | Mean    | Standard Deviation | Mean  | Standard Deviation |               |      |      |         |                      |
| B110         | 0.83          | 0.24               | 1279.00 | 11.63              | 19.75 | 3.90               | 1.07          | 0.66 | 2.83 | 1338.82 | 10000                |
| B111         | 0.83          | 0.24               | 1272.00 | 9.30               | 43.25 | 11.70              | 1.07          | 0.66 | 2.83 | 1338.82 | 10000                |
| B112         | 0.83          | 0.24               | 1272.00 | 9.30               | 37.38 | 9.75               | 1.07          | 0.66 | 2.83 | 1338.82 | 10000                |
| B113         | 0.83          | 0.24               | 1272.00 | 9.30               | 31.50 | 7.80               | 1.07          | 0.66 | 2.83 | 1338.82 | 10000                |
| B114         | 0.83          | 0.24               | 1272.00 | 9.30               | 25.63 | 5.85               | 1.07          | 0.66 | 2.83 | 1338.82 | 10000                |
| B115         | 0.83          | 0.24               | 1272.00 | 9.30               | 19.75 | 3.90               | 1.07          | 0.66 | 2.83 | 1338.82 | 10000                |
| B116         | 0.83          | 0.24               | 1265.00 | 6.98               | 43.25 | 11.70              | 1.07          | 0.66 | 2.83 | 1338.82 | 10000                |
| B117         | 0.83          | 0.24               | 1265.00 | 6.98               | 37.38 | 9.75               | 1.07          | 0.66 | 2.83 | 1338.82 | 10000                |
| B118         | 0.83          | 0.24               | 1265.00 | 6.98               | 31.50 | 7.80               | 1.07          | 0.66 | 2.83 | 1338.82 | 10000                |
| B119         | 0.83          | 0.24               | 1265.00 | 6.98               | 25.63 | 5.85               | 1.07          | 0.66 | 2.83 | 1338.82 | 10000                |
| B120         | 0.83          | 0.24               | 1265.00 | 6.98               | 19.75 | 3.90               | 1.07          | 0.66 | 2.83 | 1338.82 | 10000                |
| B121         | 0.83          | 0.24               | 1258.00 | 4.65               | 43.25 | 11.70              | 1.07          | 0.66 | 2.83 | 1338.82 | 10000                |
| B122         | 0.83          | 0.24               | 1258.00 | 4.65               | 37.38 | 9.75               | 1.07          | 0.66 | 2.83 | 1338.82 | 10000                |
| B123         | 0.83          | 0.24               | 1258.00 | 4.65               | 31.50 | 7.80               | 1.07          | 0.66 | 2.83 | 1338.82 | 10000                |
| B124         | 0.83          | 0.24               | 1258.00 | 4.65               | 25.63 | 5.85               | 1.07          | 0.66 | 2.83 | 1338.82 | 10000                |
| B125         | 0.83          | 0.24               | 1258.00 | 4.65               | 19.75 | 3.90               | 1.07          | 0.66 | 2.83 | 1338.82 | 10000                |
